# Supplementary material for: Copper deficient Zn–Cu–In–Se quantum dot sensitized solar cells for high efficiency
Source: Royal Society of Chemistry journal article supplement (doi:10.1039/c7ta06904a), 2017-01-01
Supplement: c7ta06904a1.pdf [file c7ta06904a1.pdf]

**Electronic Supporting Information (ESI)**

**Copper deficient Zn–Cu–In–Se quantum dot sensitized solar cells for high efficiency**

Linlin Zhang,<sup>ab</sup> Zhenxiao Pan,<sup>\*b</sup> Wei Wang,<sup>a</sup> Jun Du,<sup>a</sup> Zhenwei Ren,<sup>a</sup> Qing Shen,<sup>cd</sup> and Xinhua Zhong<sup>\*ab</sup>

<sup>a</sup>Key Laboratory for Advanced Materials, School of Chemistry and Molecular Engineering East China University of Science and Technology, Shanghai 200237, China

<sup>b</sup>College of Materials and Energy, South China Agricultural University, Guangzhou 510642, China

<sup>c</sup>Department of Engineering Science, University of Electro-Communications, Tokyo 182-8585, Japan

<sup>d</sup>Japan Science and Technology Agency (JST), Saitama 332-0012, Japan

---

\*Corresponding authors

Email: zxpan@scau.edu.cn (Z. P.); zhongxh@ecust.edu.cn (X. Z.)

**Table S1** The nominal reactant ratio and chemical compositions of ZCISe QDs obtained from ICP-AES.

| <b>Nominal reactant molar ratio</b> |           |           |           | <b>Chemical composition</b>                                        | <b>Measured molar</b> |
|-------------------------------------|-----------|-----------|-----------|--------------------------------------------------------------------|-----------------------|
| <b>Cu</b>                           | <b>In</b> | <b>Se</b> | <b>Zn</b> | <b>determined</b>                                                  | <b>ratio of Cu/In</b> |
|                                     |           |           |           | <b>By ICP-AES</b>                                                  | <b>By ICP-AES</b>     |
| 0.5                                 | 1         | 3         | 0.4       | $\text{Cu}_{0.72}\text{In}_{1.30}\text{Zn}_{0.14}\text{Se}_{2.79}$ | 0.55                  |
| 0.7                                 | 1         | 3         | 0.4       | $\text{Cu}_{1.01}\text{In}_{1.48}\text{Zn}_{0.11}\text{Se}_{3.04}$ | 0.68                  |
| 1.0                                 | 1         | 3         | 0.4       | $\text{Cu}_{1.34}\text{In}_{1.45}\text{Zn}_{0.13}\text{Se}_{3.12}$ | 0.92                  |

**Table S2** The values of energy level of ZCISe QDs with different Cu/In molar ratios reckoned according to the UPS and UV measurements.

| Cu/In molar ratio | First $E_{\text{cutoff}}$ (eV) | Secondary $E_{\text{cutoff}}$ (eV) | $E_g$ (eV) | $E_F$ (eV) | $E_V$ (eV) | $E_C$ (eV) |
|-------------------|--------------------------------|------------------------------------|------------|------------|------------|------------|
| 0.5               | 1.42                           | 17.44                              | 1.67       | -3.78      | -5.20      | -3.53      |
| 0.7               | 0.96                           | 17.36                              | 1.63       | -3.86      | -4.82      | -3.19      |
| 1.0               | 1.36                           | 17.83                              | 1.58       | -3.39      | -4.75      | -3.17      |

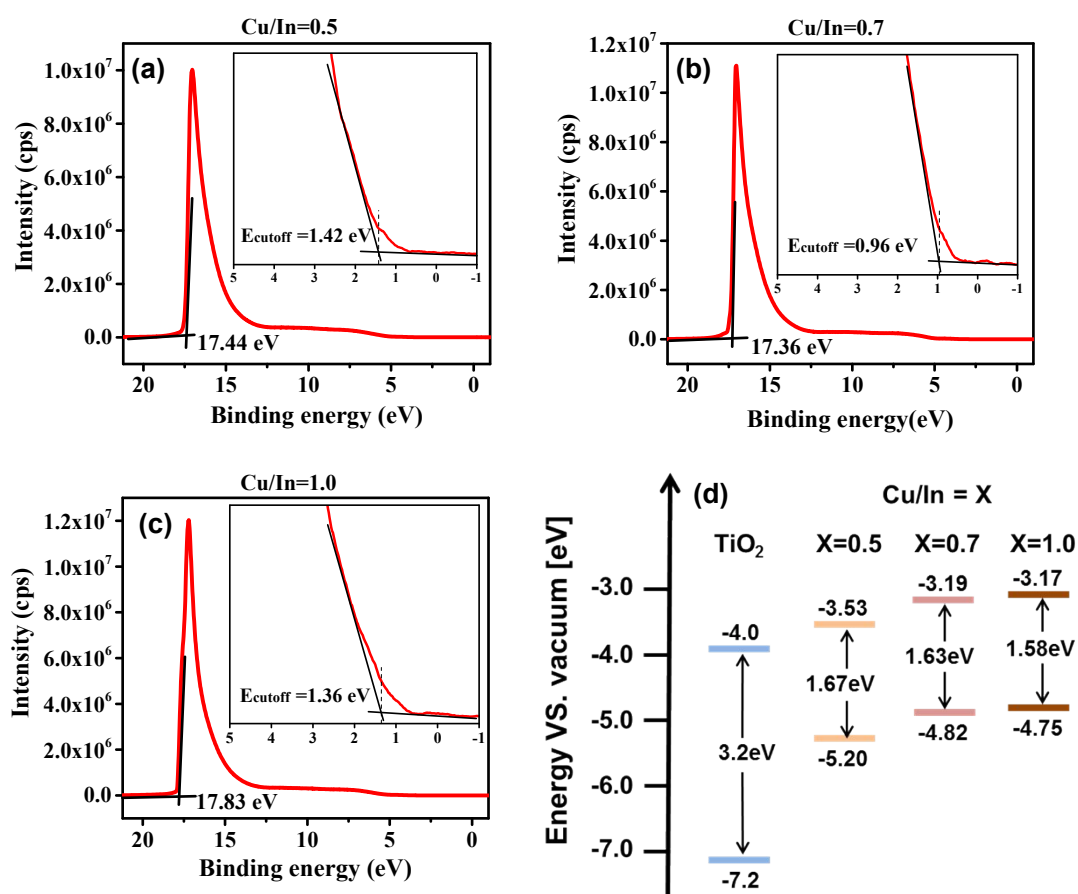

**Fig. S1** The UPS spectrum of ZCISe QDs with different Cu/In molar ratios. (a) Cu/In=0.5; (b) Cu/In=0.7; (c) Cu/In=1.0; (d) Obtained energy level diagram of TiO<sub>2</sub> and corresponding ZCISe QDs.

**Table S3** Individual photovoltaic parameters of ZCISe based QDSCs with different Cu/In molar ratios under the illumination of 1 full sun intensity (AM 1.5G, 100mW/cm<sup>2</sup>).

| Cu/In molar ratio | $J_{sc}$ (mA·cm <sup>-2</sup> ) | $V_{oc}$ (V) | FF          | PCE (%)    |
|-------------------|---------------------------------|--------------|-------------|------------|
| 0.5               | 23.89                           | 0.606        | 0.574       | 8.31       |
|                   | 23.88                           | 0.612        | 0.570       | 8.32       |
|                   | 23.91                           | 0.607        | 0.570       | 8.28       |
|                   | 23.88                           | 0.609        | 0.570       | 8.30       |
|                   | 23.82                           | 0.613        | 0.568       | 8.29       |
| Average           | 23.87±0.03                      | 0.609±0.003  | 0.570±0.002 | 8.30±0.016 |
| 0.6               | 25.24                           | 0.600        | 0.582       | 8.81       |
|                   | 25.18                           | 0.602        | 0.580       | 8.79       |
|                   | 25.20                           | 0.590        | 0.579       | 8.61       |
|                   | 25.21                           | 0.597        | 0.582       | 8.76       |
|                   | 25.17                           | 0.596        | 0.585       | 8.78       |
| Average           | 25.20±0.03                      | 0.597±0.004  | 0.581±0.002 | 8.75±0.08  |
| 0.7               | 25.88                           | 0.603        | 0.602       | 9.39       |
|                   | 26.01                           | 0.597        | 0.592       | 9.21       |
|                   | 25.93                           | 0.604        | 0.595       | 9.32       |
|                   | 25.98                           | 0.602        | 0.590       | 9.23       |
|                   | 25.82                           | 0.602        | 0.594       | 9.23       |
| Average           | 25.92±0.08                      | 0.602±0.003  | 0.595±0.004 | 9.28±0.08  |
| 0.8               | 25.51                           | 0.605        | 0.582       | 8.98       |
|                   | 25.62                           | 0.601        | 0.587       | 9.04       |
|                   | 25.56                           | 0.597        | 0.592       | 9.03       |
|                   | 25.54                           | 0.592        | 0.591       | 8.94       |
|                   | 25.58                           | 0.600        | 0.590       | 9.06       |
| Average           | 25.56±0.04                      | 0.600±0.005  | 0.588±0.004 | 8.98±0.05  |
| 1.0               | 24.82                           | 0.595        | 0.573       | 8.47       |
|                   | 24.77                           | 0.594        | 0.575       | 8.46       |
|                   | 24.65                           | 0.595        | 0.571       | 8.40       |
|                   | 24.80                           | 0.594        | 0.573       | 8.44       |
|                   | 24.86                           | 0.594        | 0.570       | 8.42       |
| Average           | 24.78±0.08                      | 0.594±0.001  | 0.572±0.002 | 8.44±0.028 |
| 0.7/MC-Ti         | 25.80                           | 0.746        | 0.638       | 12.28      |
|                   | 25.83                           | 0.738        | 0.650       | 12.39      |
|                   | 26.08                           | 0.741        | 0.639       | 12.35      |
|                   | 25.97                           | 0.752        | 0.644       | 12.57      |
|                   | 25.95                           | 0.749        | 0.641       | 12.46      |
| Average           | 25.93±0.11                      | 0.745±0.006  | 0.642±0.005 | 12.41±0.11 |

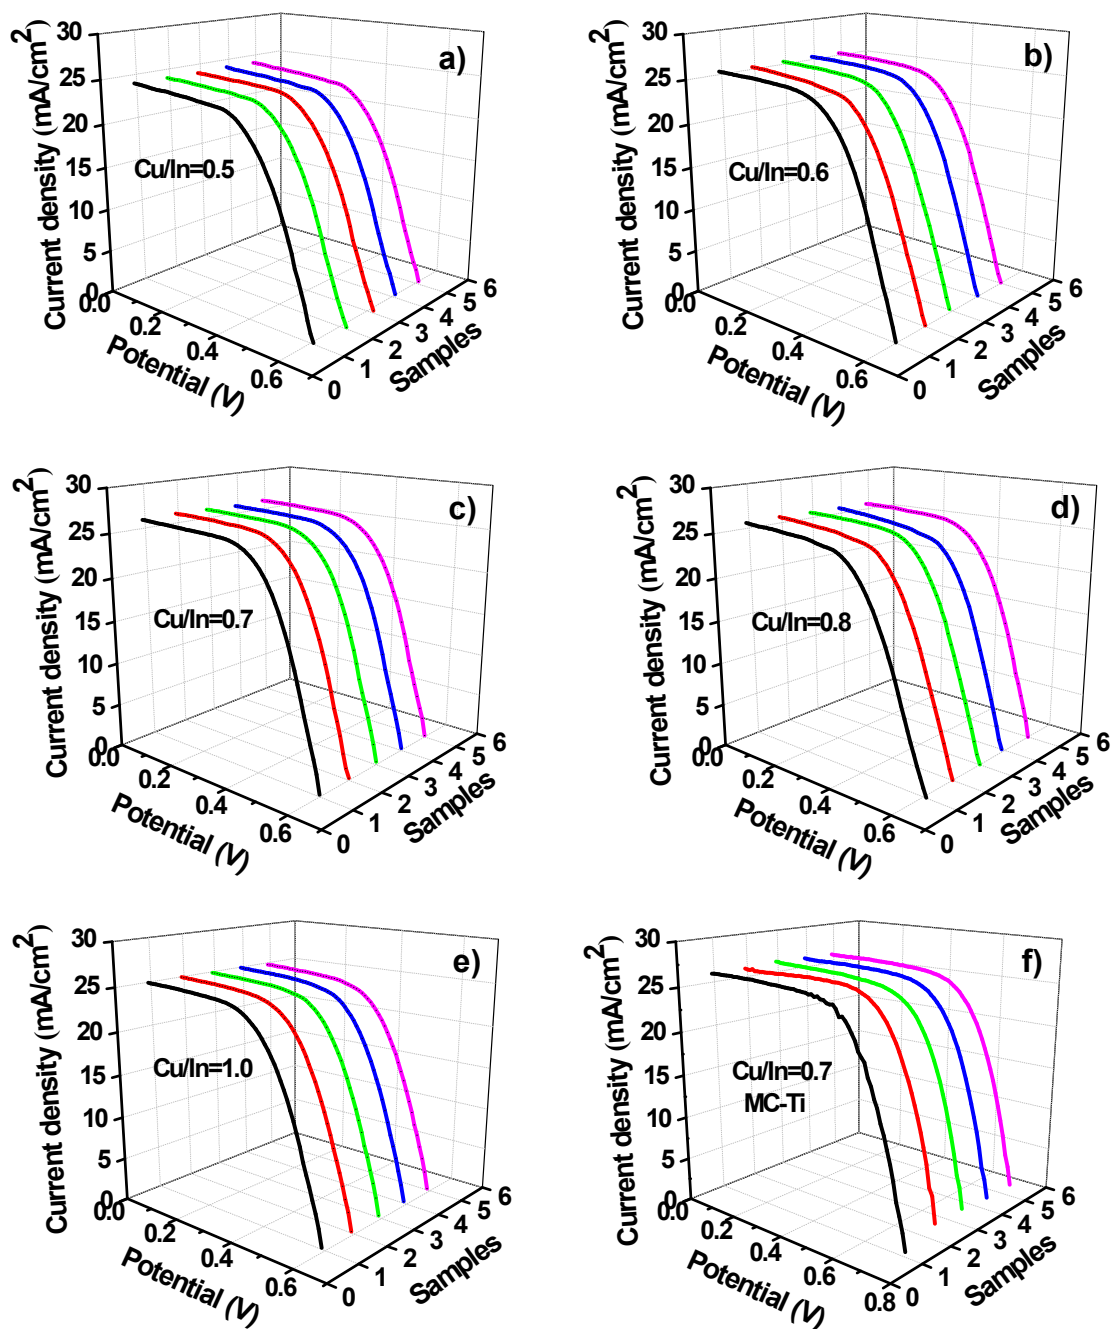

**Fig. S2** Individual  $J-V$  curves of ZCInSe based QDSCs with different Cu/In molar ratios under the illumination of 1 full sun intensity (AM 1.5G, 100 mW/cm<sup>2</sup>). (a) Cu/In=0.5, (b) Cu/In=0.6, (c) Cu/In=0.7, (d) Cu/In=0.8, (e) Cu/In=1.0, (f) Cu/In=0.7 with MC-Ti as counter electrode.

**Table S4** Impedance parameters under the forward bias of  $-0.6$  V: series resistance  $R_s$ , counter electrode charge transfer resistance  $R_{CE}$ , recombination resistance  $R_{rec}$ , chemical capacitance  $C_\mu$ , and electron lifetime  $\tau_n$  ( $\tau_n = R_{rec} \cdot C_\mu$ ).

| Cu/In<br>molar ratio | $R_s$<br>$\Omega \cdot \text{cm}^2$ | $R_{CE}$<br>$\Omega \cdot \text{cm}^2$ | $R_{rec}$<br>$\Omega \cdot \text{cm}^2$ | $C_\mu$<br>$\text{mF} \cdot \text{cm}^2$ | $\tau_n$<br>ms |
|----------------------|-------------------------------------|----------------------------------------|-----------------------------------------|------------------------------------------|----------------|
| 0.5                  | 8.558                               | 2.93                                   | 301.4                                   | 5.54                                     | 1669           |
| 0.7                  | 10.75                               | 6.14                                   | 318.0                                   | 5.70                                     | 1812           |
| 1.0                  | 12.94                               | 4.91                                   | 244.7                                   | 5.86                                     | 1434           |

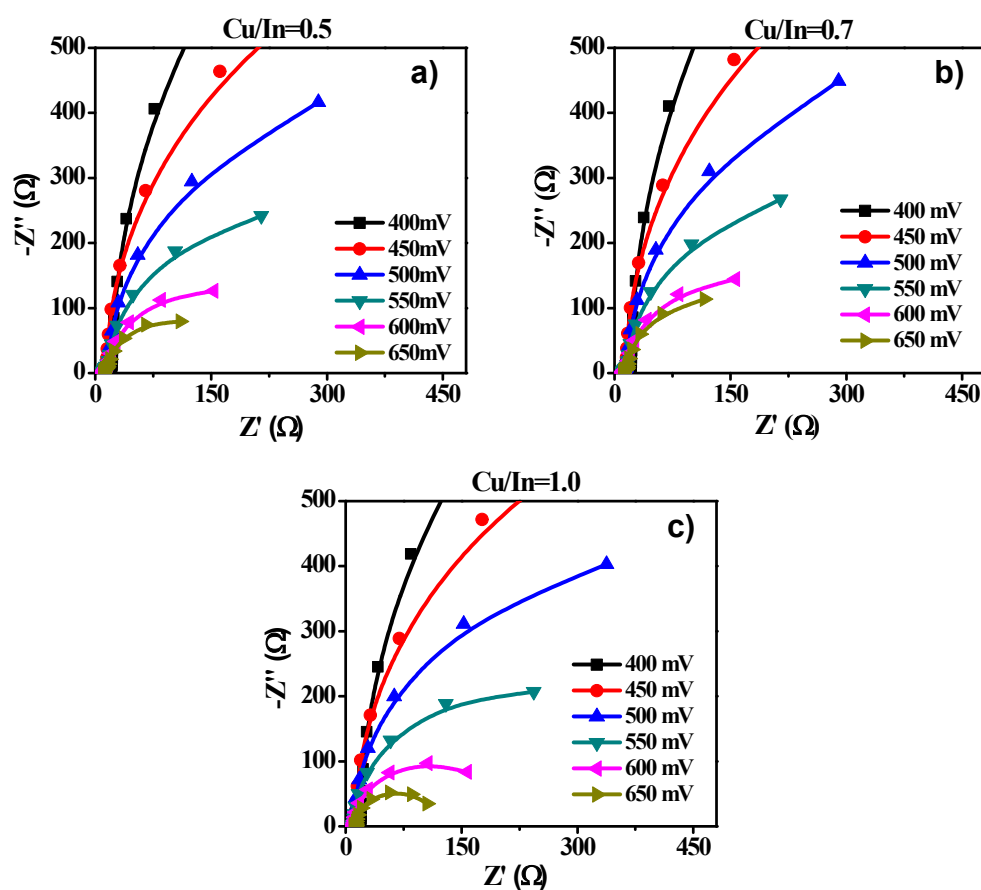

**Fig. S3** Nyquist curves under different bias voltages for ZCISE QDSCs with different Cu/In molar ratios (0.5, 0.7, and 1.0).
